# Supplementary material for: Mechanisms Behind the Indirect Impact of Metabolic Regulators on Virulence Factor Production in Staphylococcus aureus
Source: PubMed Central journal article supplement (PMC9430575; doi:10.1128/spectrum.02063-22), 2022-07-05

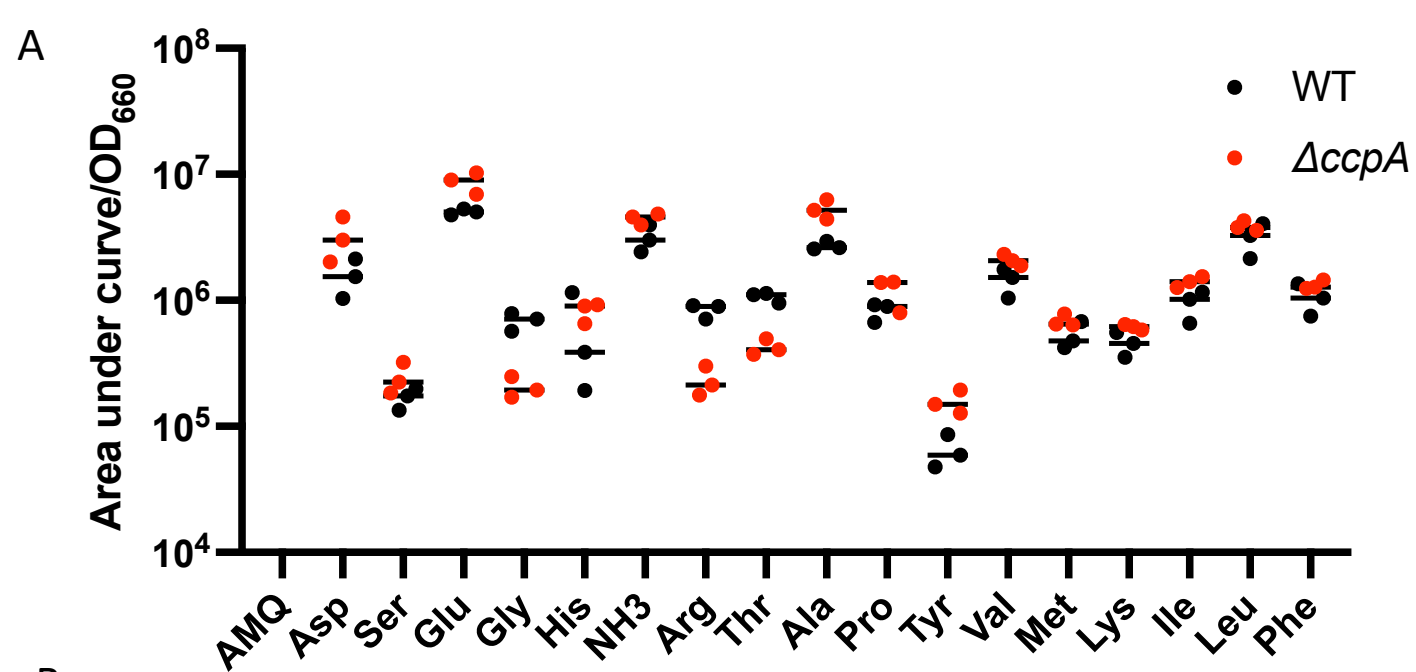

**Figure S1: Analysis of intracellular amino acid levels in WT LAC,  $\Delta ccpA$  and  $\Delta codY$  mutants.** A few amino acids (R, G and T) are under-represented in a  $\Delta ccpA$  strain (A) and all amino acids are significantly over-represented in a  $\Delta codY$  strain (B). Statistics: 2-way ANOVA with Sidak's multiple comparisons. Significance if  $p < .05$

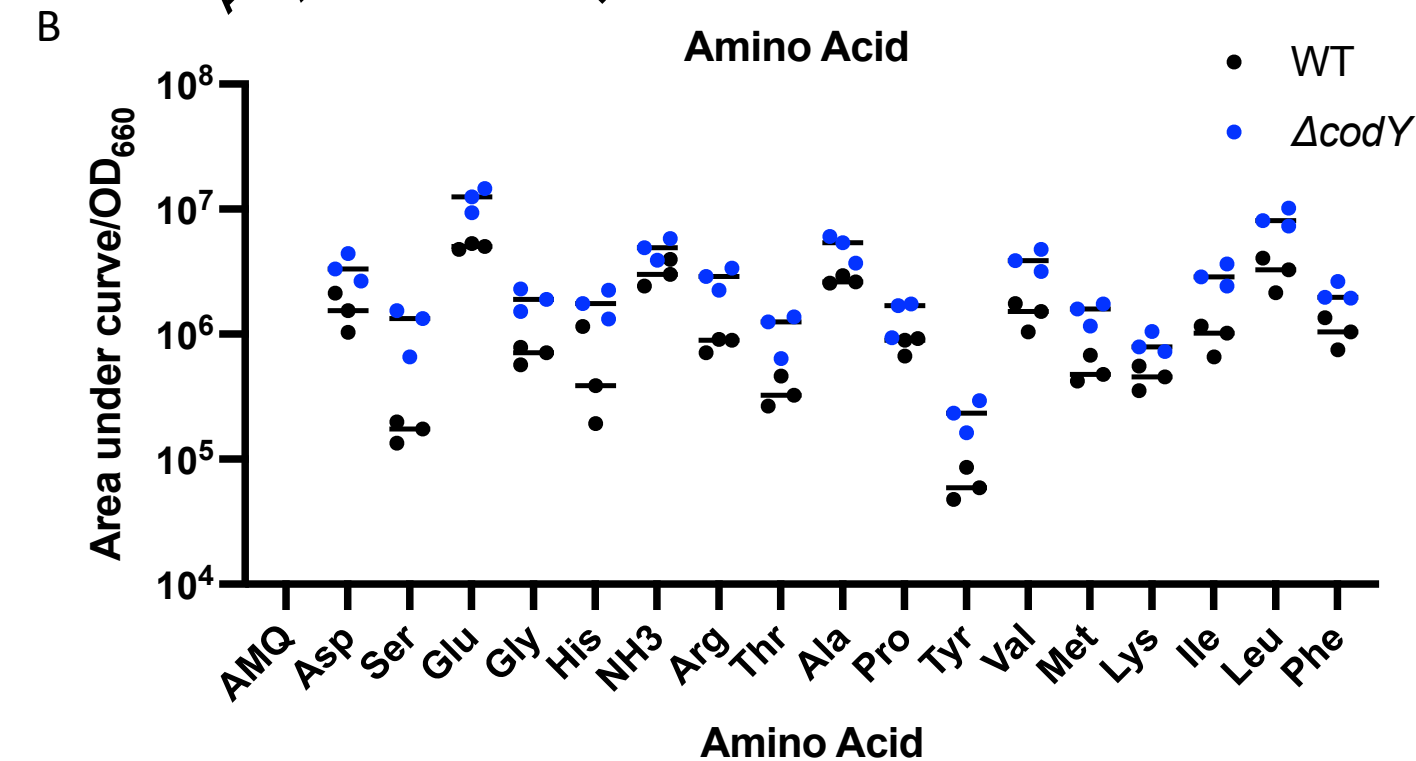

Supplement: spectrum.02063-22-s0001.pdf [file spectrum.02063-22-s0001.pdf]
